# Supplementary material for: Adenine base editing-mediated exon skipping restores dystrophin in humanized Duchenne mouse model
Source: PubMed Central journal article supplement (PMC11251194; doi:10.1038/s41467-024-50340-x), 2024-07-15
Supplement: 41467_2024_50340_MOESM1_ESM.pdf [file 41467_2024_50340_MOESM1_ESM.pdf]

1 Supplementary Information

2 **Title:** Adenine base editing-mediated exon skipping restores dystrophin in  
3 humanized Duchenne mouse model

4

5 **Authors:**

6 Jiajia Lin<sup>1†</sup>, Ming Jin<sup>1†</sup>, Dong Yang<sup>2†</sup>, Zhifang Li<sup>3†</sup>, Qingquan Xiao<sup>2</sup>, Yin Wang<sup>2</sup>,  
7 Yuyang Yu<sup>2</sup>, Yu Zhang<sup>2</sup>, Xiumei Zhang<sup>2</sup>, Zhurui Shao<sup>2</sup>, Linyu Shi<sup>2</sup>, Shu Zhang<sup>5</sup>,  
8 Wanjin Chen<sup>1</sup>, Ning Wang<sup>1\*</sup>, Shiwen Wu<sup>5\*</sup>, Hui Yang<sup>2,4\*</sup>, Chunlong Xu<sup>3,4\*</sup>,  
9 Guoling Li<sup>1, 2\*</sup>

10

11 †These authors contributed equally to this work.

12 **Affiliations:**

13 1. Department of Neurology, First Affiliated Hospital, Fujian Medical University,  
14 Fuzhou, China.

15 2. HuidaGene Therapeutics Inc., Shanghai, China.

16 3. Lingang Laboratory, Shanghai, China.

17 4. Shanghai Center for Brain Science and Brain-Inspired Technology, Shanghai,  
18 China.

19 5. Department of Neurology, First Medical Center of Chinese PLA General  
20 Hospital, Beijing, China.

21 †These authors contributed equally to this work.

22

23 \*Correspondences: guolingli@huidagene.com(G.L.), xucl@lglab.ac.cn(C.X.),  
24 huiyang@huidagene.com(H.Y.), wu\_shiwen@outlook.com(S.W.),  
25 ningwang@fjmu.edu.cn (N.W.)

26

27

28

29

30

31 **This PDF file includes:**

32 **Supplementary Figure 1 to 18**

33 Fig. S1: The muscle pathology and motor function of  $DMD^{\Delta mE5051, K1hE50/Y}$  mice  
34 at different ages.

35 Fig. S2: ABE-mediated A-to-G editing in other exon splice sites of *DMD* gene.

36 Fig. S3: Comparison of the editing efficiencies of different ABE systems split  
37 with various intein sequences *in vitro*.

38 Fig. S4: Off-target analysis in HEK293T.

39 Fig. S5: Deep-seq read analysis for ABE1 and ABE2-edited splice sites of  
40 human *DMD* exon 50.

41 Fig. S6: Rescue of dystrophin expression following intramuscular (IM) injection  
42 of ABE systems after 6 weeks.

43 Fig. S7: Analysis of dystrophin protein level and Dys+ fibers after  
44 intraperitoneally delivery of AAV-ABE2 in DMD mice.

45 Fig. S8: Immunostaining of dystrophin in heart, TA, and DI tissues 6 weeks after  
46 IP injection of AAV-ABE2.

47 Fig. S9: Toxicity response to AAV-ABE treatment after IP injection.

48 Fig. S10: Base editing analysis of satellite cells from ABE2-treated DMD mice.

49 Fig. S11: Gel electrophoresis analysis of RNA exon skipping events after 6-  
50 week and 10-month ABE2 treatment in DMD mice.

51 Fig. S12: Analysis of dystrophin protein level and Dys+ fibers after intravenously  
52 delivery in DMD mice.

53 Fig. S13: Immunostaining of dystrophin in heart, TA, and DI tissues 6 weeks  
54 and 10 months after IV injection of AAV-ABE2.

55 Figure S14. Histological analysis after systemic delivery of ABE2 in DMD mice.

56 Fig. S15. Toxicity response to AAV-ABE2 treatment after IV injection.

57 Fig. S16. Echocardiography was used to assess the cardiac function of DMD  
58 mice after systemic delivery of ABE2.

59 Fig. S17. Flow cytometry gating strategy.

60 Fig. S18. Uncropped images.

61 **Supplementary Table 1 to 2**

62 Table S1: Primer sequence.

63 Table S2: Target sgRNA sequences.

64 **Supplementary Note 1**

65 Supplementary Note 1. Sequences of ABE1 and ABE2.

66

67

68

69

70

71

72

73

74

75

76

77

78

79

80

81

82

83

84

85

86

87

88

89

90

91 **Supplementary Figures**

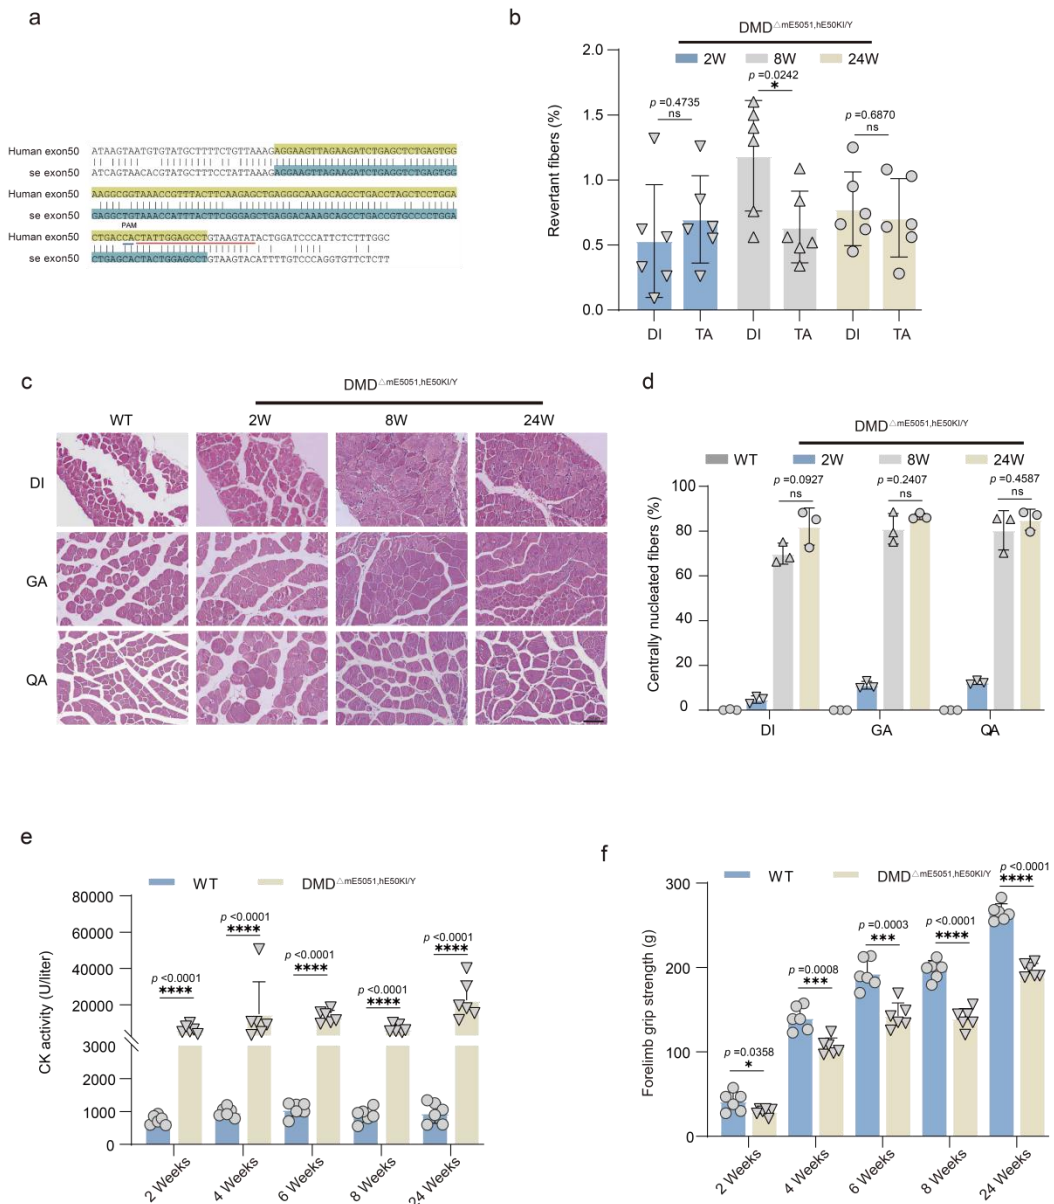

92

93 **Fig. S1: The muscle pathology and motor function of DMD $\Delta$ mE5051, KIHE50/Y**  
 94 **mice at different ages.**

95 **a**, Alignment of human and mouse exon 50 sequence. Human exon 50 (Yellow  
 96 labeling), mouse exon 50 (Blue label), sgRNA (magenta line), Protospacer  
 97 adjacent motif (Red line). **b**, Statistical analysis of the number of revertant fibers.  
 98 **c**, H&E staining of diaphragm (DI), gastrocnemius (GA), and quadriceps (QA)  
 99 muscle of WT and different age of DMD mice. Wild-type (WT) mice as control.  
 100 Scale bar, 100  $\mu$ m. **d**, Statistical analysis of nuclear migration in H&E staining.  
 101 n=3 independent biological replicates. **e**, Serum creatine kinase (CK), a marker

102 of muscle damage and membrane leakage, was measured in WT and DMD  
103 mice at the ages from 2 weeks to 24 weeks. n=6 independent biological  
104 replicates. **f**, The forelimb grip strength testing to measure muscle performance  
105 of WT and DMD mice at the ages from 2 weeks to 24 weeks. n=6 independent  
106 biological replicates. Data are presented as mean  $\pm$  s.d. Each dot represents  
107 an individual mouse. Significance is indicated by asterisk and determined using  
108 unpaired two-tailed Student's t test. \* P < 0.05. \*\*\* P < 0.001. \*\*\*\* P < 0.0001,  
109 Ns represents not statistically significant. Source data are provided as a Source  
110 Data file.

111

112

113

114

115

116

117

118

119

120

121

122

123

124

125

126

127

128

129

130

131

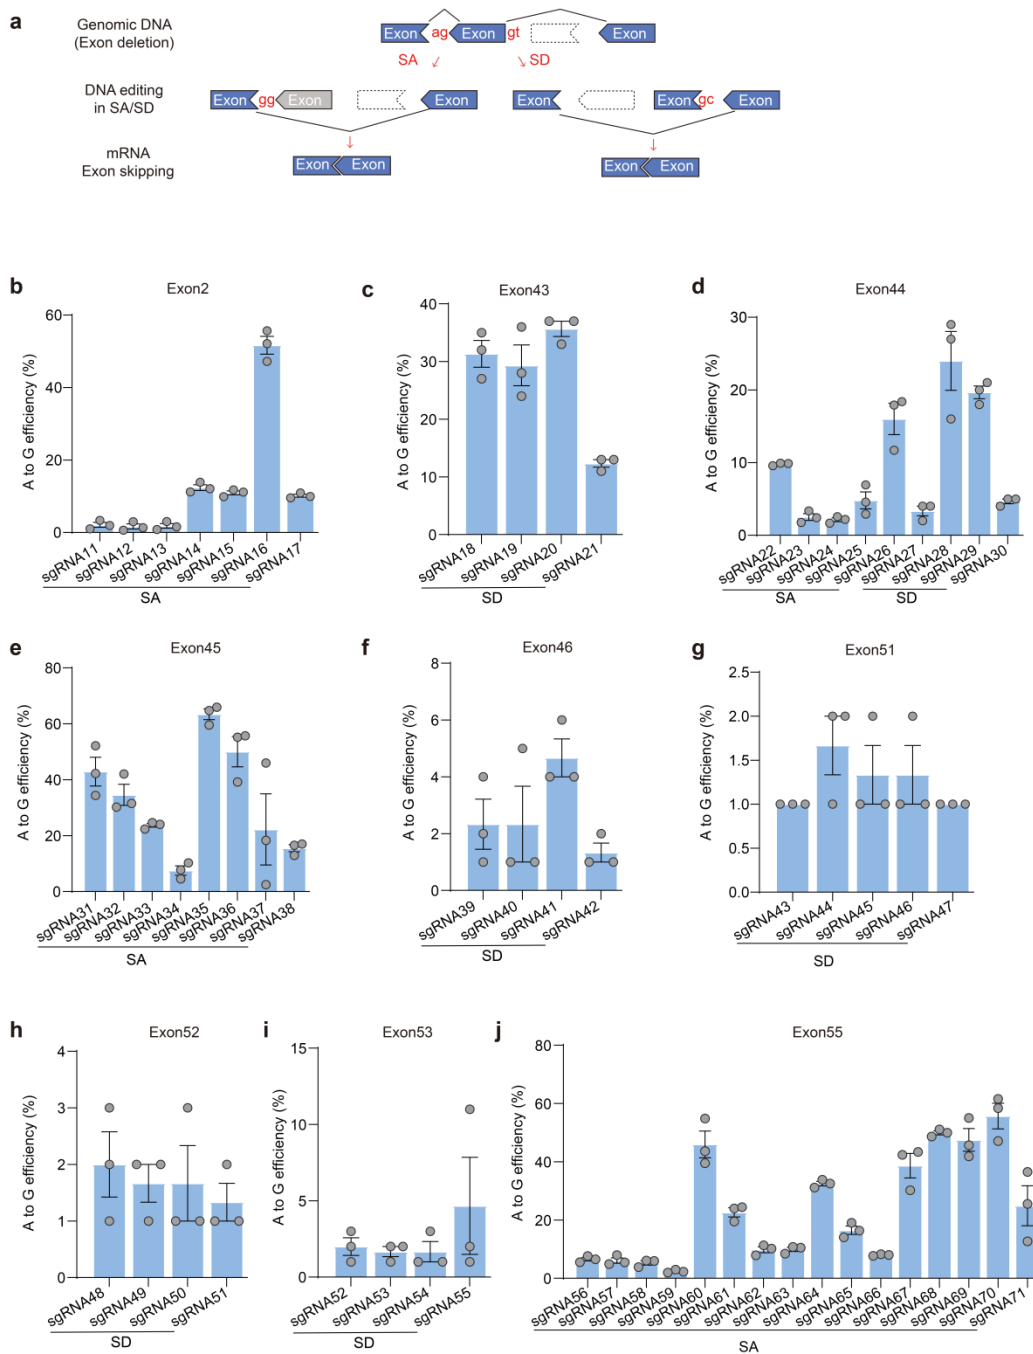

132

133 **Fig. S2: ABE-mediated A-to-G editing in other exon splice sites of *DMD***  
 134 **gene.**

135 **a**, Schematic diagram of nucleotide editing strategy in different exon splice sites.  
 136 Deletion of exon in the *Dmd* gene generates a premature stop codon in next  
 137 exon. Restoration of the correct open reading frame (ORF) can be obtained by  
 138 skipping of exon splice donor (SD) or splice acceptor (SA). Percentages of DNA  
 139 editing in *DMD* “hotspot” exon in HEK293T, including exon 2 (**b**), exon 43 (**c**),  
 140 exon 44 (**d**), exon 45 (**e**), exon 46 (**f**), exon 51 (**g**), exon 52 (**h**), exon 53 (**i**) and

141 exon 55 (j). Data are presented as mean  $\pm$  s.d (n=3 independent biological  
142 replicates). Source data are provided as a Source Data file.

143

144

145

146

147

148

149

150

151

152

153

154

155

156

157

158

159

160

161

162

163

164

165

166

167

168

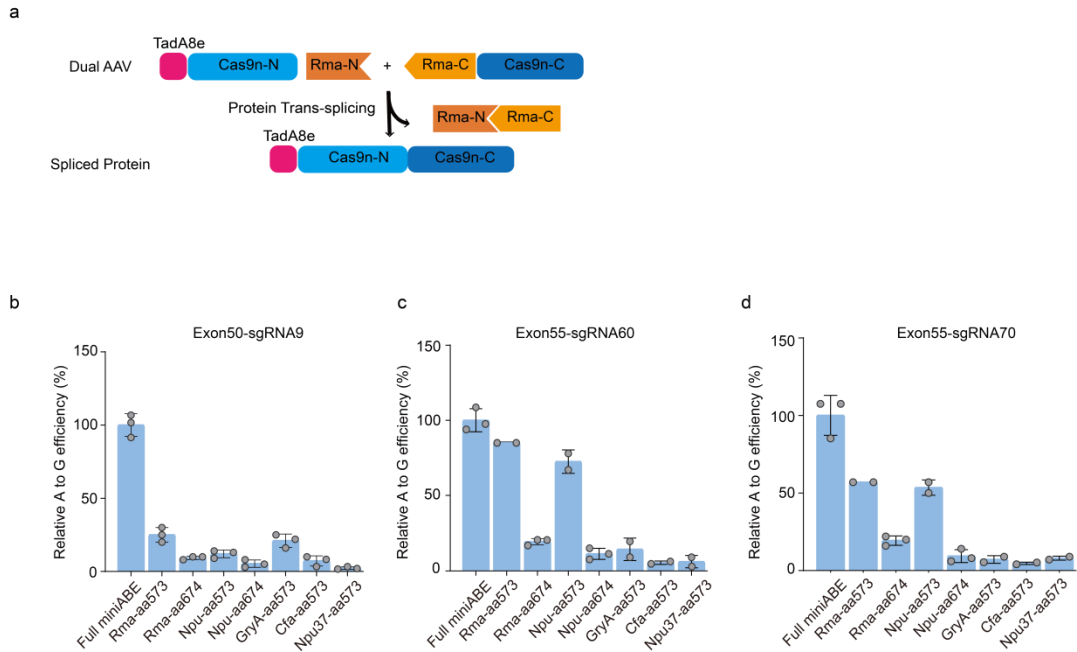

169

170 **Fig. S3: Comparison of the editing efficiencies of different ABE systems**  
 171 **split with various intein sequences in vitro.**

172 **a**, Intein reconstitution strategy. Dual adeno-associated virus (AAV) vectors  
 173 separately encoded protein fragments fused to split intein halves splice to  
 174 reconstitute full-length protein following co-expression; Comparison of the  
 175 editing efficiencies in *DMD* gene exon 50 (**b**), and exon 55 (**c** and **d**) with split  
 176 ABE via various intein. Data are normalized with full-length protein and  
 177 presented as mean  $\pm$  s.d (n=2 or 3 independent biological replicates). Source  
 178 data are provided as a Source Data file.

179

180

181

182

183

184

185

186

187



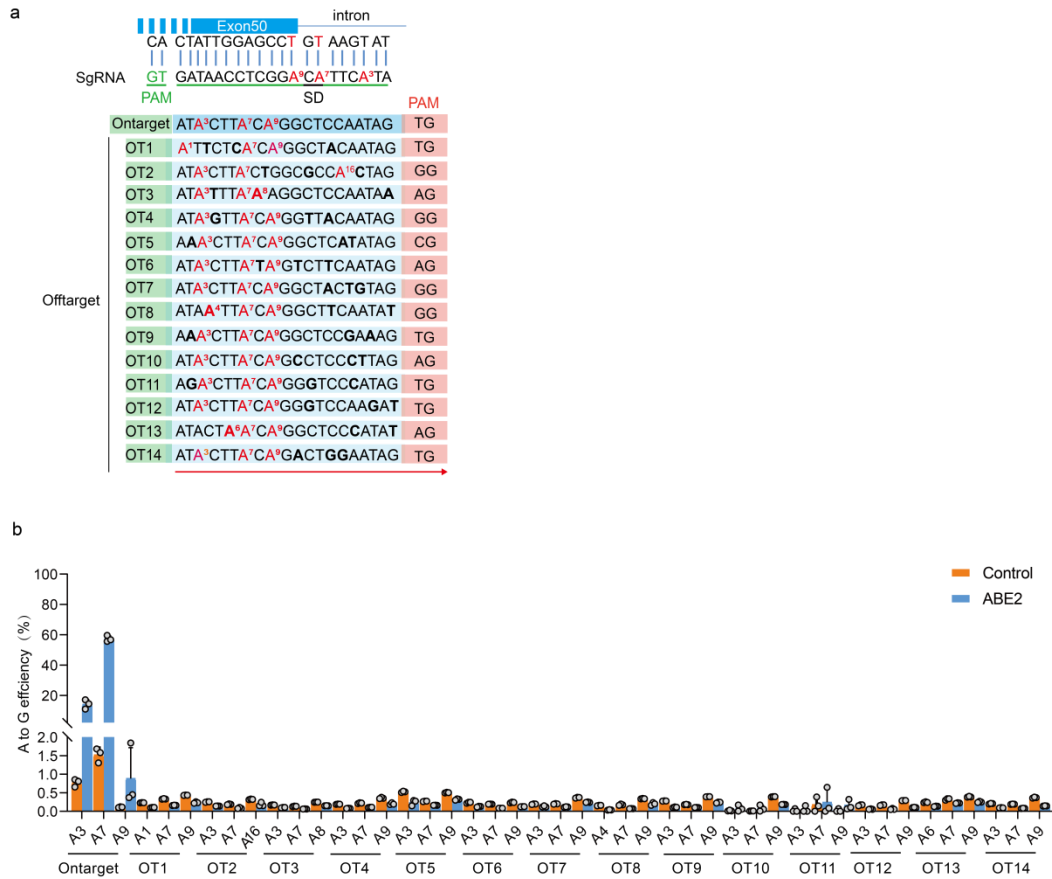

188

189 **Fig. S4: Off-target analysis in HEK293T.**

190 **a**, Alignment of the top 14 off-target sites in human genomic DNA. Potential off-  
 191 target adenines are highlighted in red font, while black highlighted characters  
 192 represent bases that are mismatched with on-target gRNA; **b**, Percentages of  
 193 adenine editing in the all 14 potential off-target sites. Data are presented as  
 194 mean  $\pm$  s.d (n=3 independent biological replicates). Source data are provided  
 195 as a Source Data file.

196

197

198

199

200

201

202

203

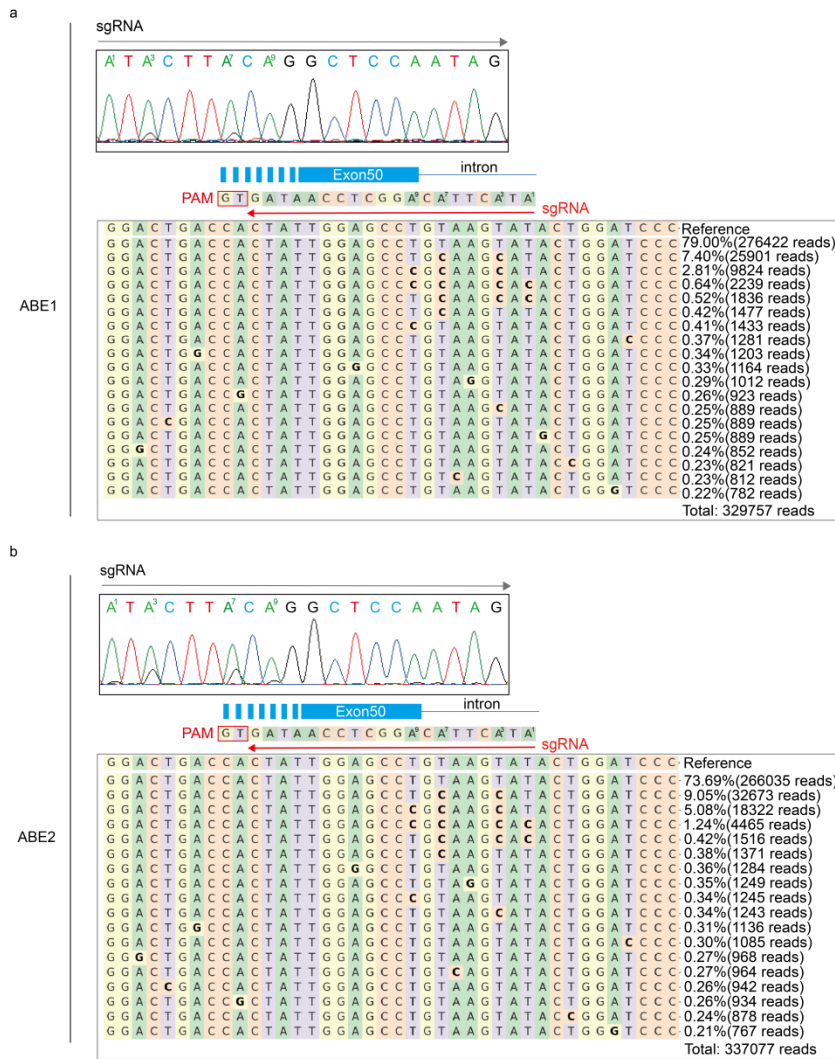

204

205 **Fig. S5: Deep-seq read analysis for ABE1 and ABE2-edited splice sites of**  
 206 **human *DMD* exon 50.**

207 Chromatogram and deep-seq reads results for ABE1- (a) and ABE2-edited (b)  
 208 splice sites of human *DMD* exon 50, respectively. The red arrow indicates the  
 209 direction of the sgRNA, and the red box represents the PAM recognition  
 210 sequence.

211

212

213

214

215

216

Tibial anterior muscle

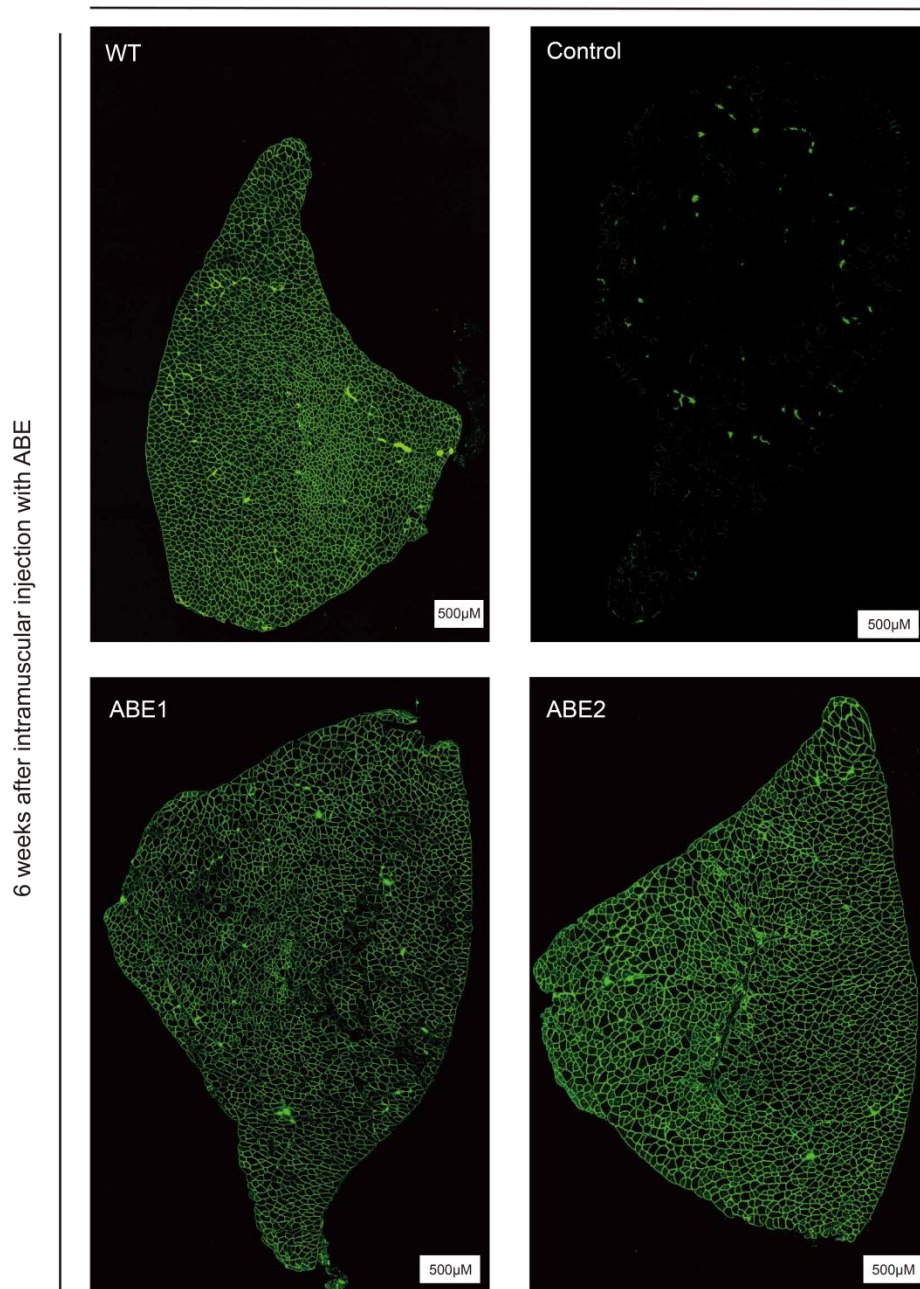

217

218 **Fig. S6: Rescue of dystrophin expression following intramuscular (IM)**  
219 **injection of ABE systems after 6 weeks.**

220 Dystrophin immunohistochemistry of entire tibialis anterior (TA) muscle. Control  
221 mice were injected with saline. Dystrophin is shown in green. Scale bar, 500  
222 µm.

223

224

225

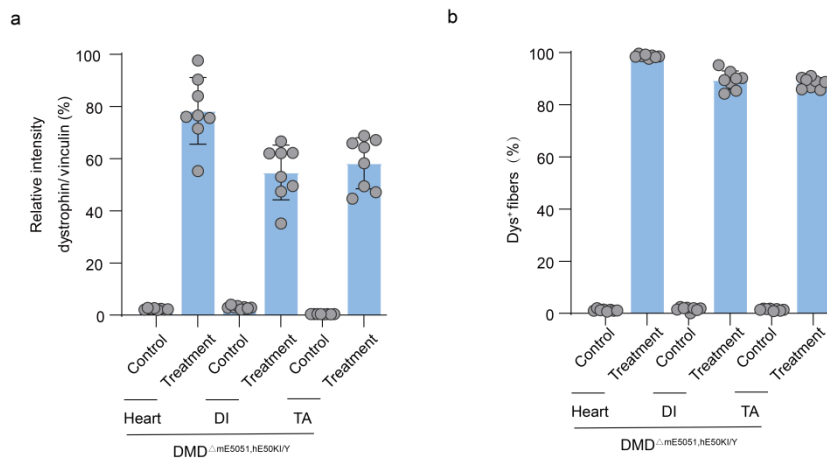

226

227 **Fig. S7: Analysis of dystrophin protein level and Dys+ fibers after**  
 228 **intraperitoneally delivery of AAV-ABE2 in DMD mice.**

229 **a**, Relative dystrophin intensity was calibrated against the internal vinculin  
 230 control and normalized to the wild-type dystrophin level. **b**, Percentage of Dys+  
 231 tissue area in tibialis anterior (TA) from treated and untreated  
 232 DMD $\Delta$ mE5051,KlhE50/Y mice. Data are presented as mean  $\pm$  s.d (n=8 independent  
 233 biological replicates). Significance is indicated with asterisk and determined  
 234 using unpaired two-tailed Student's t test. Ns, not statistically significant. Source  
 235 data are provided as a Source Data file.

236

237

238

239

240

241

242

243

244

245

246

247

6 weeks after intraperitoneal injection with ABE2

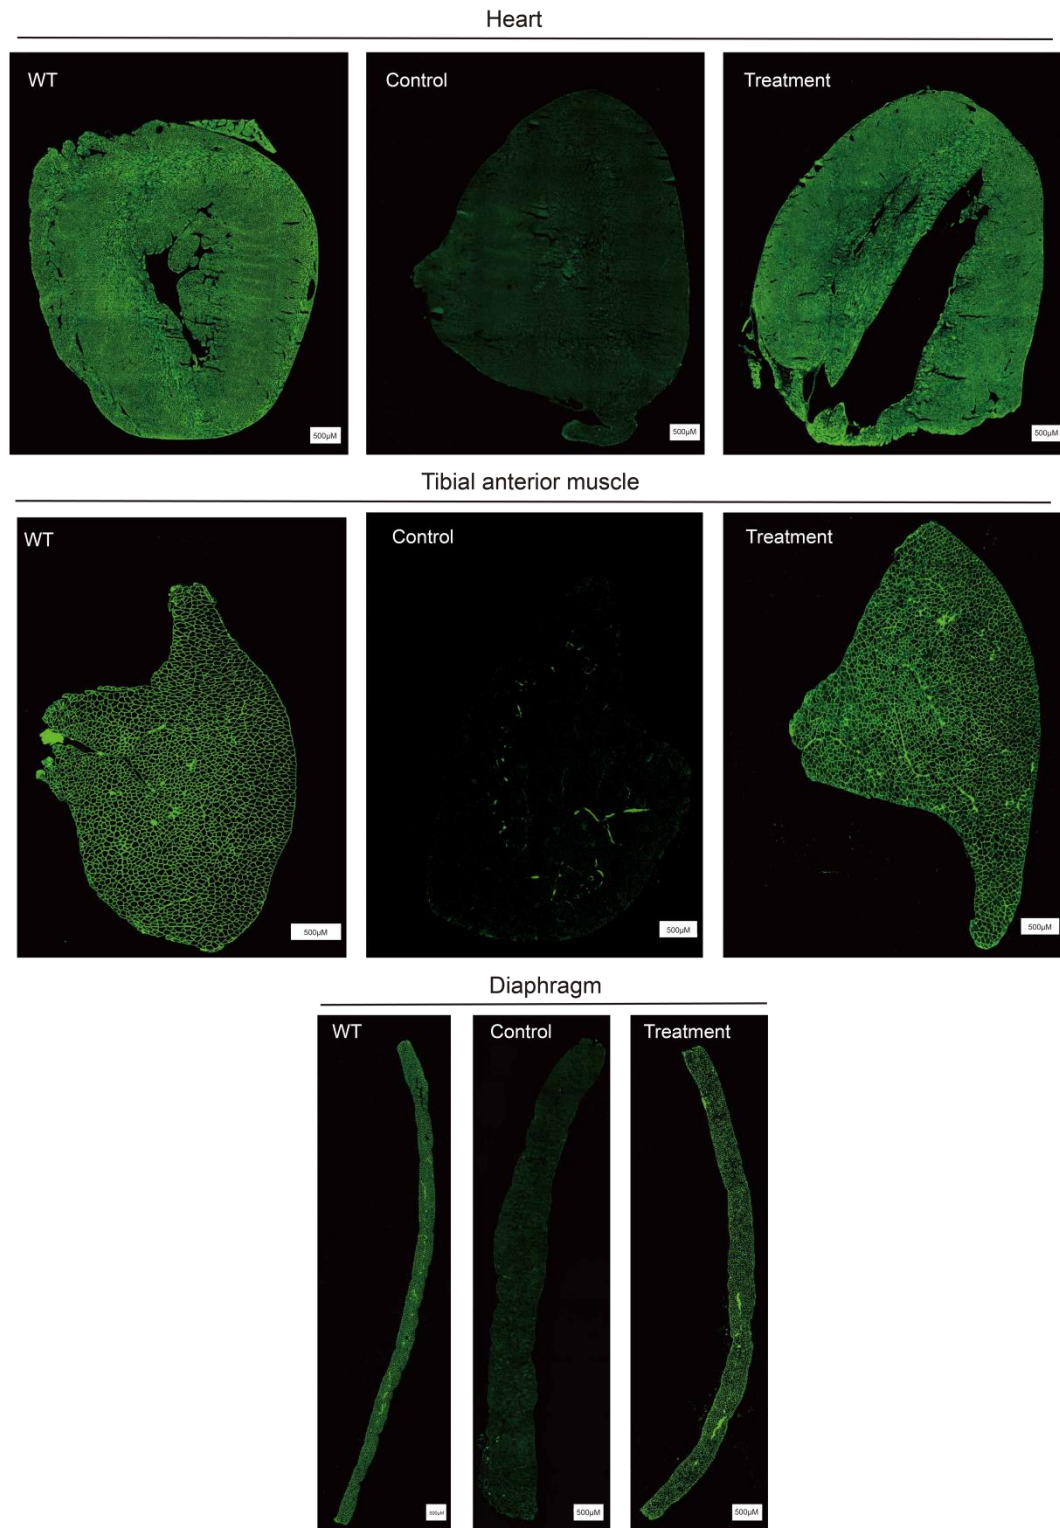

Fig.S8

248

249 **Fig. S8: Immunostaining of dystrophin in heart, TA, and DI tissues 6 weeks**  
250 **after IP injection of AAV-ABE2.**

251 Whole-muscle scanning of diaphragm (DI), tibialis anterior (TA) and and heart  
252 of  $DMD^{\Delta mE5051, K1hE50/Y}$  mice 6 weeks after systemic delivery of ABE2 particles.

253 Control mice were injected with saline. Dystrophin is shown in green. Scale bar,  
254 500  $\mu\text{m}$ . Images shown in both Fig. 4f and Fig. S7 were obtained from the same  
255 tissue at 20 $\times$  magnification. Fig. 4f showed the local region staining image  
256 rather than the reconstituted whole-tissue scanning image in Fig. S8.

257

258

259

260

261

262

263

264

265

266

267

268

269

270

271

272

273

274

275

276

277

278

279

280

281

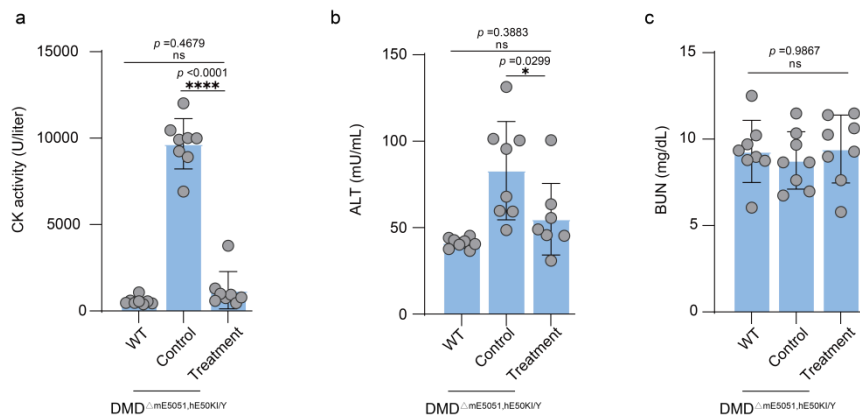

282

283 **Fig. S9: Toxicity response to AAV-ABE treatment after IP injection.**

284 Characterization of creatine kinase (CK) (a), alanine aminotransferase (ALT) (b)

285 and blood urea nitrogen (BUN) (c) activity after intraperitoneal injection of AAV-

286 ABE2 (n=8 independent biological replicates). Data are shown as mean  $\pm$  s.d.

287 Significance is indicated by asterisk and determined using unpaired two-tailed

288 Student's t test. \* P < 0.05. \*\*\*\* P < 0.0001, Ns represents not statistically

289 significant. Source data are provided as a Source Data file.

290

291

292

293

294

295

296

297

298

299

300

301

302

303

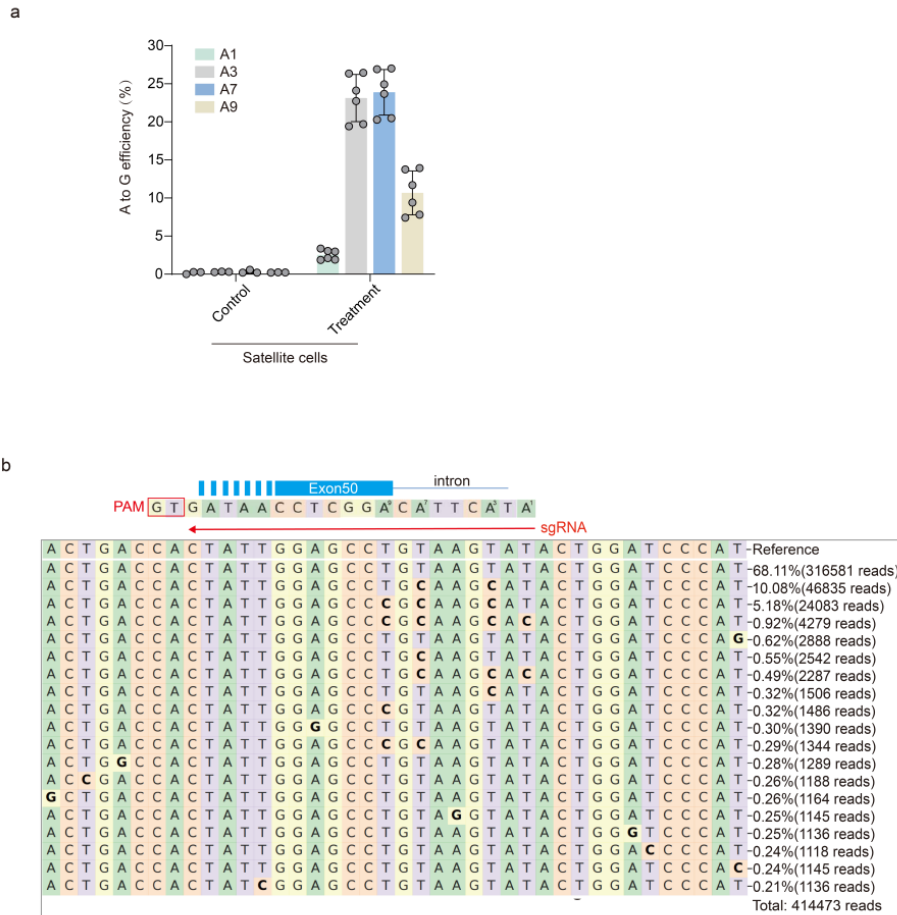

304

305 **Fig. S10: Base editing analysis of satellite cells from ABE2-treated DMD**  
 306 **mice.**

307 **a**, A-to-G conversion efficiency for adenine on the target splice site of human  
 308 *DMD* exon 50. **b**, Deep-seq read analysis of ABE2-edited satellite cells. Source  
 309 data are provided as a Source Data file.

310

311

312

313

314

315

316

317

318



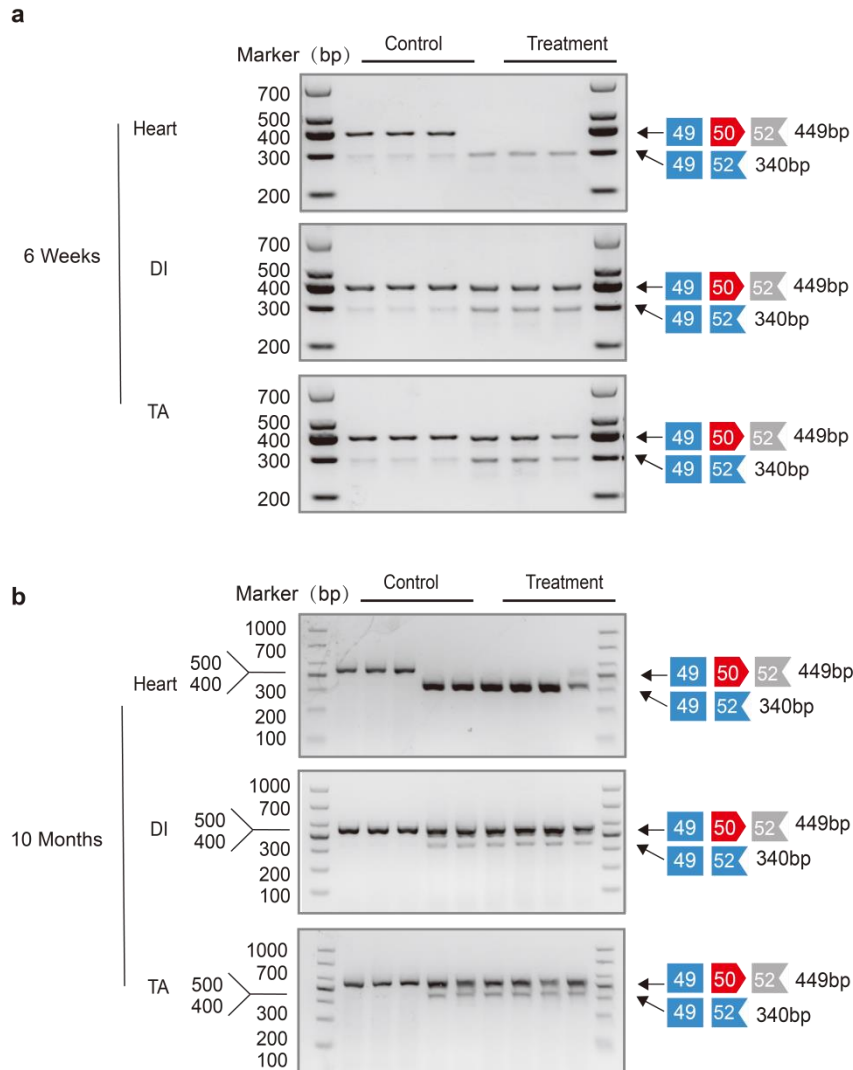

319

320 **Fig. S11: Gel electrophoresis analysis of RNA exon skipping events after**  
 321 **6-week and 10-month ABE2 treatment in DMD mice.**

322 Gel electrophoresis results for *DMD* exon 50 skipping induction by ABE2 at 6-  
 323 week (**a**) and 10-month (**b**) post AAV injection in *DMD*<sup>ΔmE5051, K1hE50/Y</sup> mice.

324 Source data are provided as a Source Data file.

325

326

327

328

329

330

331

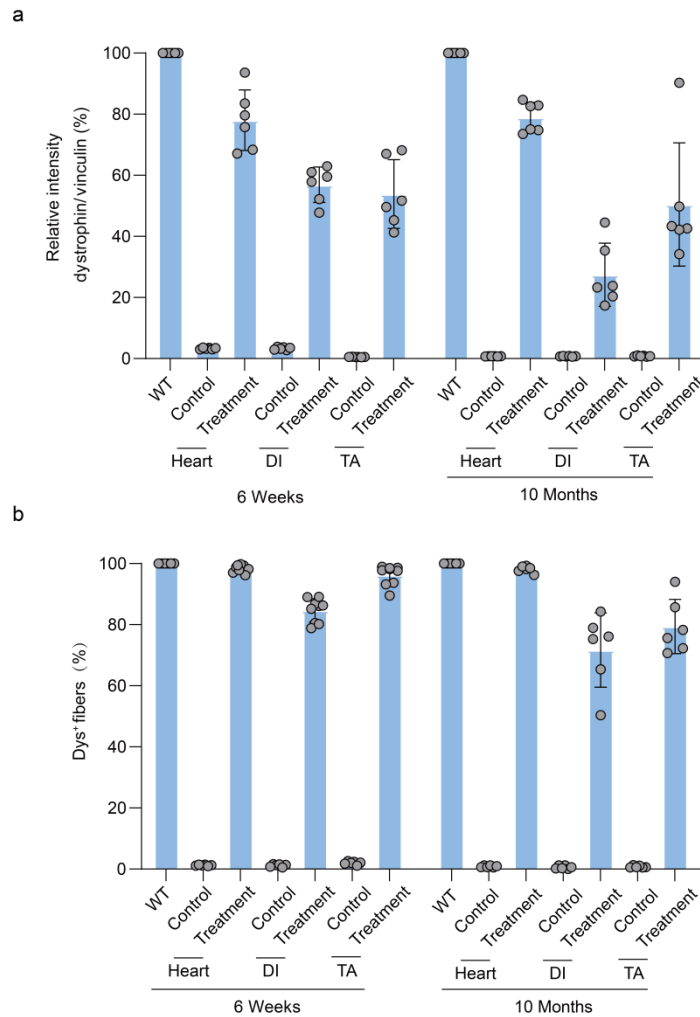

332

333 **Fig. S12: Analysis of dystrophin protein level and Dys+ fibers after**  
 334 **intravenously delivery in DMD mice.**

335 **a**, Relative dystrophin intensity was calibrated against the internal vinculin  
 336 control and normalized to the wildtype dystrophin level. **b**, Percentage of Dys+  
 337 tissue area in TA, DI and heart from treated and untreated DMD<sup>ΔmE5051,KlhE50/Y</sup>  
 338 mice. Data are shown as mean ± s.d (n=6 independent biological replicates for  
 339 10-month post-treatment group and n=9 independent biological replicates for  
 340 6-week post-treatment group). Significance is indicated by asterisk and  
 341 determined using unpaired two-tailed Student's t test. Ns represents not  
 342 statistically significant. Source data are provided as a Source Data file.

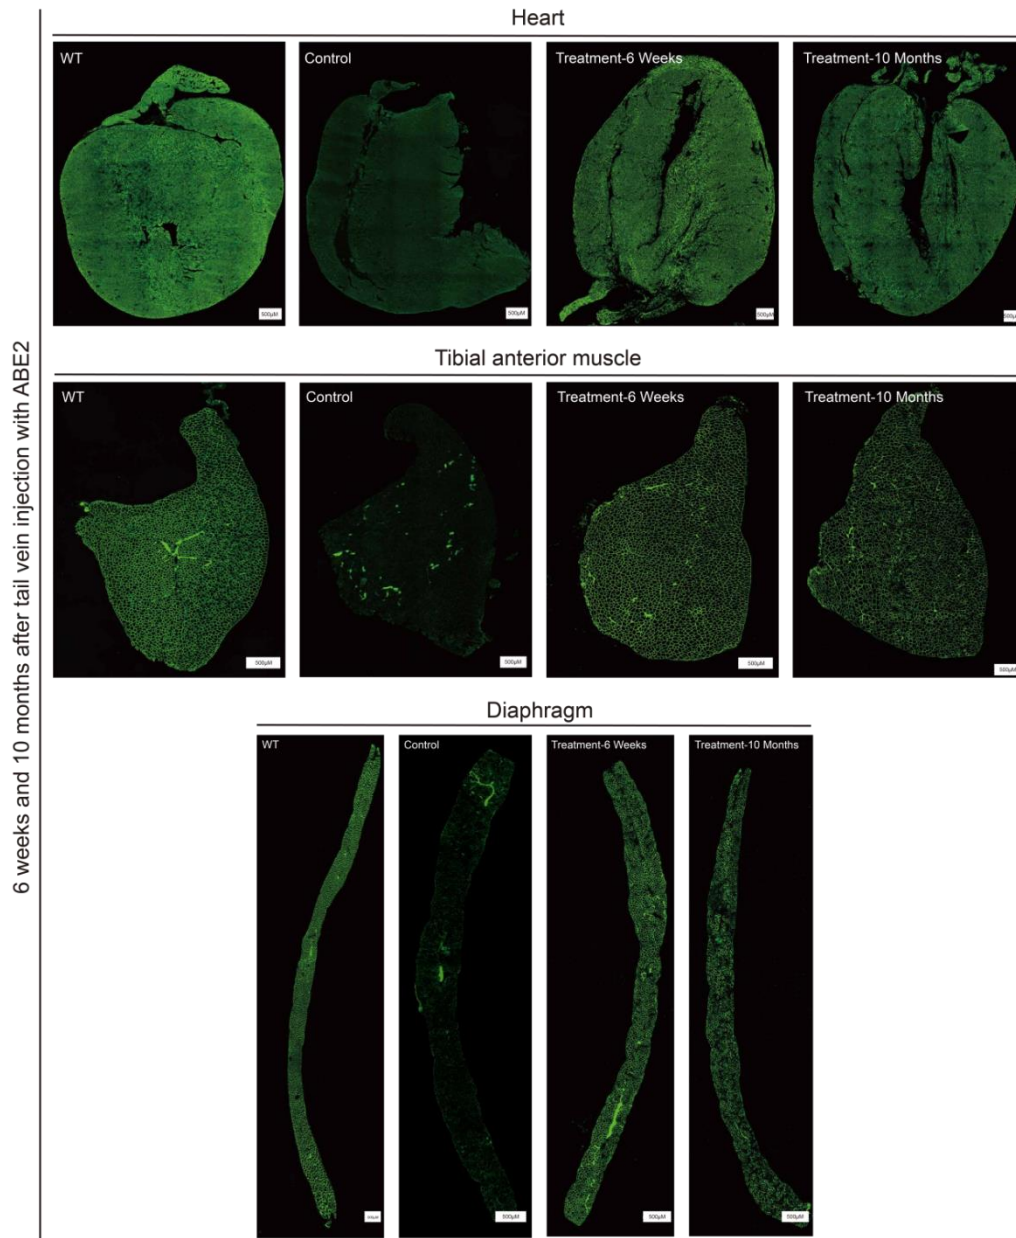

343

344 **Fig. S13: Immunostaining of dystrophin in heart, TA, and DI tissues 6**  
 345 **weeks and 10 months after IV injection of AAV-ABE2.**

346 Whole-muscle scanning of tibialis anterior (TA), diaphragm (DI), and heart  
 347 muscle of  $DMD^{\Delta mE5051, K1hE50/Y}$  mice 6 weeks and 10 months after systemic  
 348 delivery of ABE2 particles. Control DMD mice were injected with saline.  
 349 Dystrophin is shown in green. Scale bar, 500  $\mu m$ . Images shown in both Fig. 5e  
 350 and Fig. S13 were obtained from the same tissue at 20 $\times$  magnification. Fig. 5e  
 351 showed the local region staining image rather than the reconstituted whole-  
 352 tissue scanning image in Fig. S13.

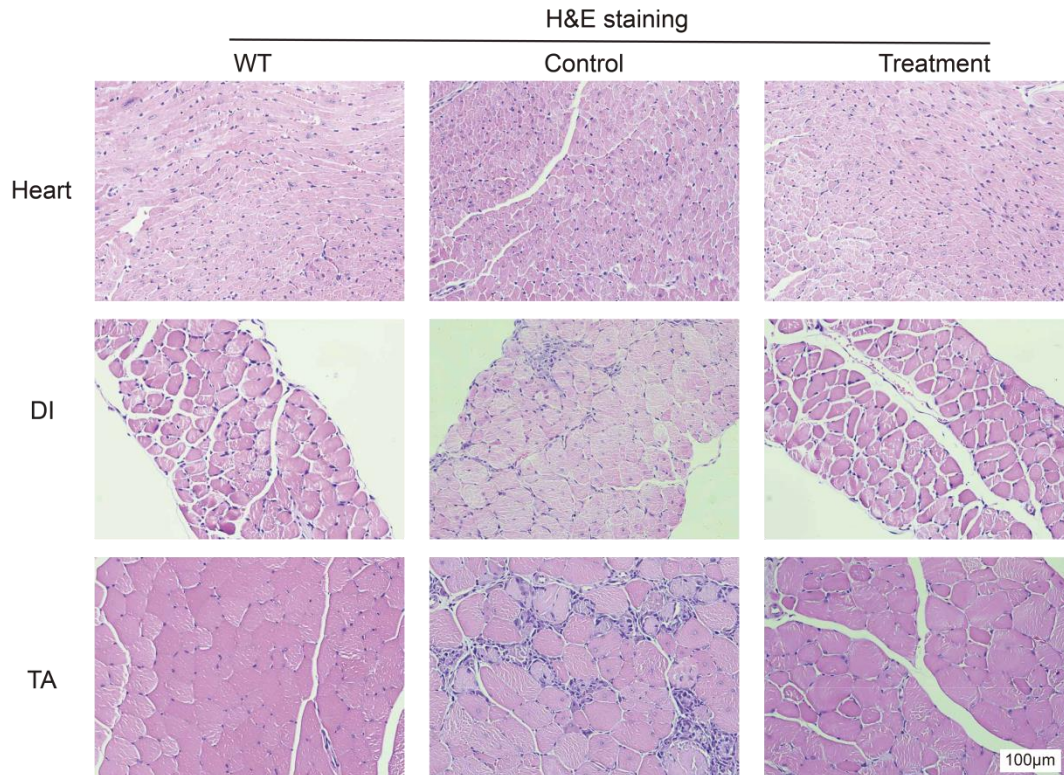

353

354 **Figure S14. Histological analysis after systemic delivery of ABE2 in DMD**  
 355 **mice.**

356 H&E staining of tibialis anterior (TA), diaphragm (DI), and heart of wild-type  
 357 (WT), untreated and ABE2-treated DMD<sup>ΔmE5051,KlhE50/Y</sup> mice at 6-week after  
 358 intravenous injection. Scale bars, 100 μm.

359

360

361

362

363

364

365

366

367

368

369

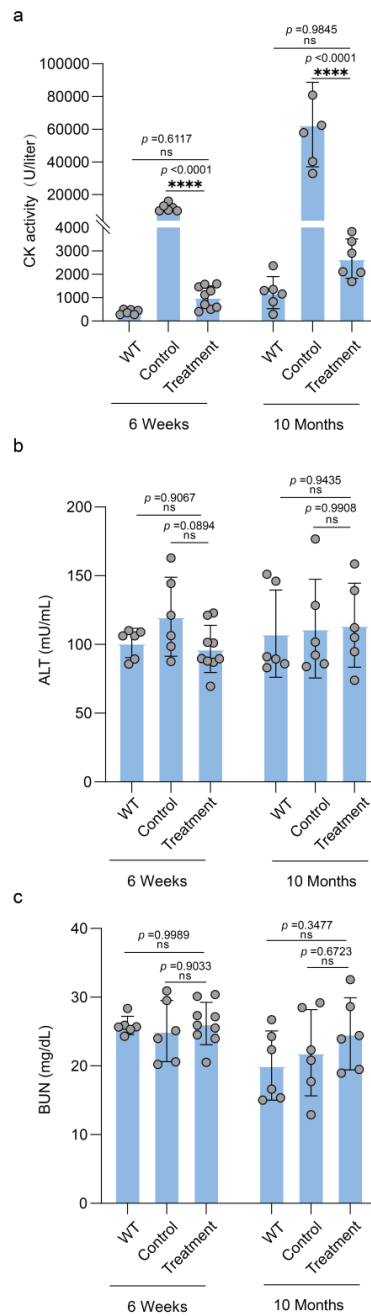

370

371 **Fig. S15: Toxicity response to AAV-ABE2 treatment after IV injection.**

372 CK (a), ALT (b) and BUN (c) activity was detected after intraperitoneal injection  
 373 with ABE2. Data are presented as mean  $\pm$  s.d (n=6 independent biological  
 374 replicates for 10-month post-treatment group and n=9 independent biological  
 375 replicates for 6-week post-treatment group). Significance is indicated by  
 376 asterisk and determined using unpaired two-tailed Student's t test. \*\*\*\* P <  
 377 0.0001, Ns represents not statistically significant. Source data are provided as  
 378 a Source Data file.

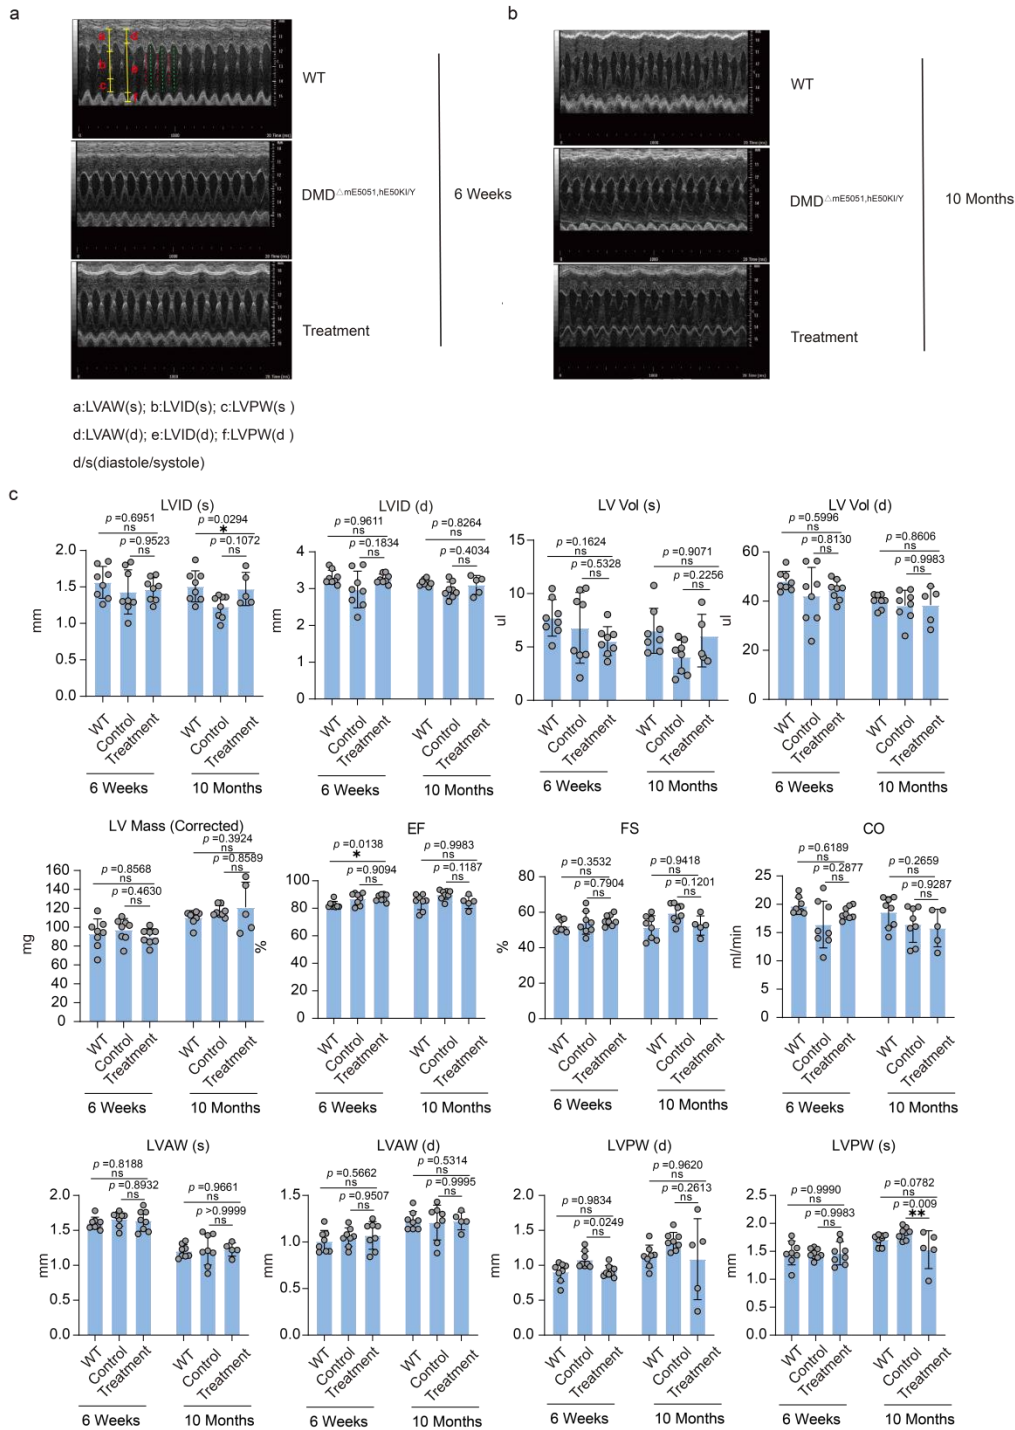

379

380 **Fig. S16: Echocardiography was used to assess the cardiac function of**  
 381 **DMD mice after systemic delivery of ABE2.**

382 **a-b**, Representative echocardiographic images for DMD $\Delta$ mE5051,KihE50/Y mice  
 383 with or without ABE2 administration were monitored for 6 weeks (**a**) and 10  
 384 months (**b**). Age-matched WT and DMD mice were included as controls. **c**,  
 385 Echocardiographic analysis was performed in WT, DMD-mock, and DMD mice

386 treated with ABE2 after 6 weeks and 10 months injection. LVID;d or LVID;s: Left  
387 Ventricular Internal Diameter during diastole or systole; LVPW;d or LVPW;s:  
388 Left Ventricular Posterior Wall Thickness during diastole or systole; LVPW;d or  
389 LVPW;s: Left Ventricular Posterior Wall Thickness during diastole or systole;  
390 LVAW;d or LVAW;s: Left Ventricular Anterior Wall Thickness during diastole or  
391 systole; LV Vol;d or LV Vol;s: Left Ventricular Volume during diastole or systole;  
392 EF: Ejection Fraction; FS: Fractional Shortening; CO: Cardiac Output; LV Mass  
393 (corrected): Left Ventricular Mass corrected for body surface area. Values are  
394 shown as mean  $\pm$  s.d (n=8 independent biological replicates and n=5  
395 independent biological replicates for 10-month post-treatment group).  
396 Significance is indicated by asterisk and determined using unpaired two-tailed  
397 Student's t test. \* P < 0.05. \*\* P < 0.01, Ns represents not statistically significant.  
398 Source data are provided as a Source Data file.

399

400

401

402

403

404

405

406

407

408

409

410

411

412

413

414

415

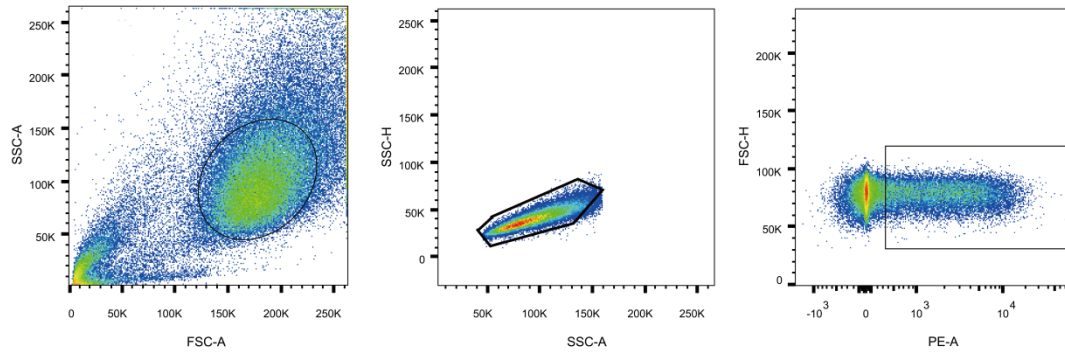

416

417 **Fig. S17. Flow cytometry gating strategy.**

418 Cell singletons were first gated out via forward scatter (FSC) and side scatter  
419 (SSC) parameters. Fluorescent cells were then gated for gene editing analysis.

420 Source data are provided as a Source Data file.

421

422

423

424

425

426

427

428

429

430

431

432

433

434

435

436

437

438

439



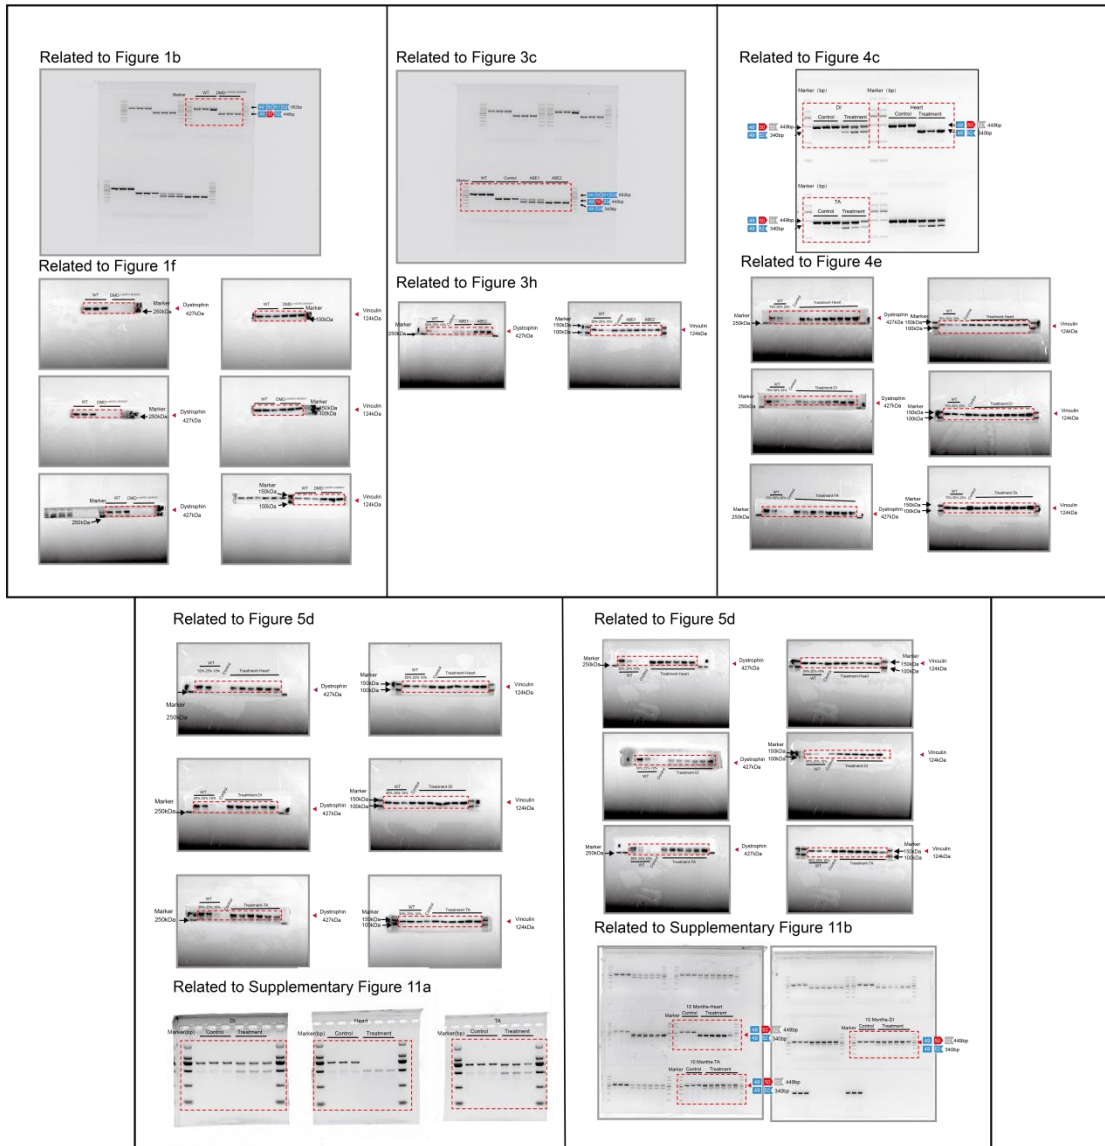

440

441 **Fig. S18. Uncropped images.**

442 The red rectangles indicate the cropping location.

443

444

445

446

447

448

449

450

451 **Table S1: Primer sequence.**

| Experiment                                          | Primer name        | Primer sequence (5'-3')  | Product (bp)                  |
|-----------------------------------------------------|--------------------|--------------------------|-------------------------------|
| Genotyping of DMD <sup>ΔmE5051, KihE51/Y</sup> mice | All-TGF            | TTCACCTTGCCCTCTTGACC     | 6791                          |
|                                                     | All-TGR            | GATCAGCAGCCATAAGCTC      |                               |
|                                                     | Intron50-KOF       | GCCACATCAGCTCTATCTTCGG   | 714                           |
|                                                     | Intron50-KOR       | ACAGACAATGGCAATTAAGTCC   |                               |
| RT-PCR primer flanking exon 50                      | RNA-E50F           | AGATTGAAGTAACAGTTCACGGTA | WT:682<br>Hete:682+449        |
|                                                     | RNA-E50R           | TGTTCCGGCTTCTTCCTTAGCTT  | Homo:449<br>Exon skipping:340 |
| Genomic DNA PCR primer flanking exon 50             | DNA-E50F           | TTGTTCCAGGTGCAATACCCACA  | 975                           |
|                                                     | DNA-E50R           | AATTTAACTGAGCCACTATGCTT  |                               |
| PCR in different exon                               | Cell lysis exon2F  | TACTGGCCTCAAGTGATCCG     | 510                           |
|                                                     | Cell lysis exon2R  | CCATATCTTCTGCTGCTTACTCC  |                               |
|                                                     | Cell lysis exon43F | AAGAAAAGAAGTGCAAATACTGA  | 803                           |
|                                                     | Cell lysis exon43R | TGTTTATAGCACCTCAATGCC    |                               |
|                                                     | Cell lysis exon44F | AAGAAAATGCCAATAGTCCAAA   | 792                           |
|                                                     | Cell lysis exon44R | GGTTCCAACATAAAGCCGAA     |                               |
|                                                     | Cell lysis exon45F | GACAAGAAATCGAATTTGCTCT   | 759                           |
|                                                     | Cell lysis exon45R | CCTTTAAGCAATCATGGGT      |                               |
|                                                     | Cell lysis exon46F | TTTAAATTGCCATGTTTGTGTC   | 337                           |
|                                                     | Cell lysis exon46R | CTAATGGGCAGAAAACCAAT     |                               |
|                                                     | Cell lysis exon51F | TTATCCCATCTTGTTTTGCCTT   | 857                           |
|                                                     | Cell lysis exon51R | ATGGCTACTTTTGTATTTGCATT  |                               |
|                                                     | Cell lysis exon52F | ATGTCTCCATTTGAGCCTT      | 683                           |
|                                                     | Cell lysis exon52R | TGCCAGCCCAGATGACAAC      |                               |
|                                                     | Cell lysis exon53F | ATGGATATTCTGCTGTAGTGCTT  | 806                           |
|                                                     | Cell lysis exon53R | CACGCCTGGCTAGTAGTCCC     |                               |

|  |                    |                        |     |
|--|--------------------|------------------------|-----|
|  | Cell lysis exon55F | GAGCAGCATCAAAGACAAGCA  | 918 |
|  | Cell lysis exon55R | GTTTCTCCTTGACCGAAGCTCT |     |

452

453 **Table S2: Target sgRNA sequences.**

| Experiment                                                     | Primer name  | Primer sequence (5'-3') |
|----------------------------------------------------------------|--------------|-------------------------|
| sgRNA for generation DMD <sup>Δ</sup><br>mE5051, KihE51/Y mice | DMD-T7sgRNA1 | CCTGTGATCATGGGTCTAGG    |
|                                                                | DMD-T7sgRNA2 | ACACACTATTCATTCTACTC    |
| DNA base editing sgRNA in exon<br>50                           | sgRNA1       | TATACTTACAGGCTCCAAT     |
|                                                                | sgRNA2       | GTATACTTACAGGCTCCAAT    |
|                                                                | sgRNA3       | GGTATACTTACAGGCTCCAAT   |
|                                                                | sgRNA4       | TACTTACAGGCTCCAATAG     |
|                                                                | sgRNA5       | ATACTTACAGGCTCCAATAG    |
|                                                                | sgRNA6       | GATACTTACAGGCTCCAATAG   |
|                                                                | sgRNA7       | GGATACTTACAGGCTCCAATAG  |
|                                                                | sgRNA8       | TACTTACAGGCTCCAATAGT    |
|                                                                | sgRNA9       | GTACTTACAGGCTCCAATAGT   |
|                                                                | sgRNA10      | GGTACTTACAGGCTCCAATAGT  |
| DNA base editing sgRNA in exon 2                               | sgRNA11      | GCATTTTAGATGAAAGAGA     |
|                                                                | sgRNA12      | CATTTTAGATGAAAGAGA      |
|                                                                | sgRNA13      | GATTTTAGATGAAAGAGA      |
|                                                                | sgRNA14      | GCATTTTAGATGAAAGAGAAGA  |
|                                                                | sgRNA15      | GATTTTAGATGAAAGAGAAGA   |
|                                                                | sgRNA16      | GTTTLAGATGAAAGAGAAGA    |
|                                                                | sgRNA17      | GTTTAGATGAAAGAGAAGA     |
| DNA base editing sgRNA in exon 43                              | sgRNA18      | ACCTACCCTTGTCGGTCCT     |
|                                                                | sgRNA19      | TACCTACCCTTGTCGGTCCT    |
|                                                                | sgRNA20      | GTACCTACCCTTGTCGGTCCT   |
|                                                                | sgRNA21      | GGTACCTACCCTTGTCGGTCCT  |

|                                   |                                   |                        |
|-----------------------------------|-----------------------------------|------------------------|
| DNA base editing sgRNA in exon 44 | sgRNA22                           | GTACCTGCAGGCGATTTGAC   |
|                                   | sgRNA23                           | GCCTGCAGGCGATTTGAC     |
|                                   | sgRNA24                           | GCTGCAGGCGATTTGACAGATC |
|                                   | sgRNA25                           | GTGCAGGCGATTTGACAGATC  |
|                                   | sgRNA26                           | TGCAGGCGATTTGACAGATC   |
|                                   | sgRNA27                           | CTTACCTTAAGATACCATT    |
|                                   | sgRNA28                           | ACTTACCTTAAGATACCATT   |
|                                   | sgRNA29                           | GACTTACCTTAAGATACCATT  |
|                                   | sgRNA30                           | GGACTTACCTTAAGATACCATT |
|                                   | DNA base editing sgRNA in exon 45 | sgRNA31                |
| sgRNA32                           |                                   | GTCTTACAGGAACTCCAGGA   |
| sgRNA33                           |                                   | GCTTACAGGAACTCCAGGA    |
| sgRNA34                           |                                   | GTTACAGGAACTCCAGGA     |
| sgRNA35                           |                                   | GTCTTACAGGAACTCCAGGAT  |
| sgRNA36                           |                                   | GCTTACAGGAACTCCAGGAT   |
| sgRNA37                           |                                   | GTTACAGGAACTCCAGGAT    |
| sgRNA38                           |                                   | GTACAGGAACTCCAGGAT     |
| DNA base editing sgRNA in exon 46 | sgRNA39                           | GAGCAAGTCAAGGTAATTT    |
|                                   | sgRNA40                           | TGAGCAAGTCAAGGTAATTT   |
|                                   | sgRNA41                           | GTGAGCAAGTCAAGGTAATTT  |
|                                   | sgRNA42                           | GGTGAGCAAGTCAAGGTAATTT |
| DNA base editing sgRNA in exon 51 | sgRNA43                           | TTTTCTCATACCTTCTGCT    |
|                                   | sgRNA44                           | TCTCATACCTTCTGCTTGA    |
|                                   | sgRNA45                           | TTCTCATACCTTCTGCTTGA   |
|                                   | sgRNA46                           | GTTCTCATACCTTCTGCTTGA  |
|                                   | sgRNA47                           | GGTCTCATACCTTCTGCTTGA  |
| DNA base editing sgRNA in exon 52 | sgRNA48                           | AACTTACTTCGATCCGTAA    |
|                                   | sgRNA49                           | AAACTTACTTCGATCCGTAA   |
|                                   | sgRNA50                           | GAAACTTACTTCGATCCGTAA  |

|                                   |         |                        |
|-----------------------------------|---------|------------------------|
|                                   | sgRNA51 | GGAAACTTACTTCGATCCGTAA |
| DNA base editing sgRNA in exon 53 | sgRNA52 | TGATACTAACCTTGGTTTC    |
|                                   | sgRNA53 | TTGATACTAACCTTGGTTTC   |
|                                   | sgRNA54 | GTTGATACTAACCTTGGTTTC  |
|                                   | sgRNA55 | ATACTAACCTTGGTTTCTG    |
|                                   | sgRNA56 | GTCCTTTCAGGGTGAGTGAG   |
| DNA base editing sgRNA in exon 55 | sgRNA57 | GCCTTTCAGGGTGAGTGAG    |
|                                   | sgRNA58 | GCTTTCAGGGTGAGTGAG     |
|                                   | sgRNA59 | GTTTCAGGGTGAGTGAG      |
|                                   | sgRNA60 | GCTTTCAGGGTGAGTGAGCG   |
|                                   | sgRNA61 | GTTTCAGGGTGAGTGAGCG    |
|                                   | sgRNA62 | GTTGCAGGGTGAGTGAGCG    |
|                                   | sgRNA63 | GTGCAGGGTGAGTGAGCG     |
|                                   | sgRNA64 | GTTTCAGGGTGAGTGAGCG    |
|                                   | sgRNA65 | GTTGCAGGGTGAGTGAGCG    |
|                                   | sgRNA66 | GTGCAGGGTGAGTGAGCG     |
|                                   | sgRNA67 | GTTGCAGGGTGAGTGAGCGAG  |
|                                   | sgRNA68 | GTGCAGGGTGAGTGAGCGAG   |
|                                   | sgRNA69 | TGCAGGGTGAGTGAGCGAG    |
|                                   | sgRNA70 | TTGCAGGGTGAGTGAGCGAGA  |
|                                   | sgRNA71 | GTGCAGGGTGAGTGAGCGAGA  |

454

455

456

457

458

459

460 **Supplementary Note 1. Sequences of ABE1 and ABE2.**

461 hU6-Spacer-SpCas9 sgRNA scaffiod-Spc5-12-BPNLS-TadA8e-Linker-Cas9n  
462 (D10A)-N-Rma-N-W3SL

463 gagggcctatttcccatgattcctcatattgcatatacgatacaaggctgtagagagataattggaattaatt  
464 tgactgtaaacacaaagatattagtacaaaatacgtgacgtagaaagtaataatttctgggtagttgcagttt  
465 taaaattatgtttaaaatggactatcatatgcttaccgtaactgaaagtatttcgatttctggctttatatacttG  
466 TGGAAAGGACGAAACACC GATACTTACAGGCTCCAATAGgttttagagctaGAA  
467 Atagcaagttaaaataaggctagtcggttatcaactgaaaaagtggcaccgagtcggtgc TTTTTTga  
468 gggcctatttcccatgattcctcatattgcatatacgatacaaggctgtagagagataattggaattaattg  
469 actgtaaacacaaagatattagtacaaaatacgtgacgtagaaagtaataatttctgggtagttgcagttta  
470 aaattatgtttaaaatggactatcatatgcttaccgtaactgaaagtatttcgatttctggctttatatacttGT  
471 GGAAAGGACGAAACACC GATACTTACAGGCTCCAATAGgttttagagctaGAAAt  
472 agcaagttaaaataaggctagtcggttatcaactgaaaaagtggcaccgagtcggtgc Tttttttttcaccg  
473 cgggtggcggccgtccgccctcggcaccatcctcacgacacccaaatatggcgacgggtgaggaatgggtg  
474 gggagttatttttagagcggtaggaagggtgggcaggcagcaggtgtggcgctctaaaataactcccgg  
475 gagttatttttagagcggaggaatggtggacacccaaatatggcgaccggttctcaaccggtcgccatattt  
476 ggggtgccccctcggccggggccgcattcctgggggcccggcggtgctccgcccgcctcgataaaag  
477 gctccggggccggcggcggcccacgagcaccggtgccaccaccggtgccaccatgaaacgggacagcc  
478 gacggaagcaggttcgagtcaccaagaagaagcggaaagtctctgaggtggagtttcccacgagtact  
479 ggatgagacatgccctgaccctggccaagagggcacgcgatgagagggaggtgcctgtgggagccgtg  
480 ctgggtctgaacaatagagtatcggcgagggctggaacagagccatcggcctgcacgacccaacagc  
481 ccatgccgaaattatggccctgagacagggcggcctgggtcatgcagaactacagactgattgacgccacc  
482 ctgtacgtgacattcgagccttgcgtgatgtgcgccggcggccatgatccactctaggatcggccgctggtgt  
483 ttggcgtgaggaacTCAaaaAGAggcgccgagcCTCCCTGATGAACGTGCTGAACT  
484 ACCCCGGCATGAATCACCGCGTCGAAATTACCGAGGGAATCCTGGCAGA  
485 TGAATGTGCCGCCCTGCTGTGCGATTTCTATCGGATGCCTAGACAGGTGT  
486 TCAATGCTCAGAAGAaggcccagagctccATCAACtccggaggatctagcggaggctcctct  
487 ggctctgagacacctggcacaagcgagagcgcaacacctgaaagcagcgggggagcagcgggggg  
488 tcagacaagaagtacagcatcggcctggccatcggcaccaactctgtgggctgggccgtgatcaccgac

489 gagtacaaggtgccagcaagaaattcaaggtgctgggcaacaccgaccggcacagcatcaagaaga  
490 acctgatcggagccctgctgttcgacagcggcgaaacagccgaggccacccggctgaagagaaccgcc  
491 agaagaagatacaccagacggaagaaccggatctgctatctgcaagagatcttcagcaacgagatggc  
492 caaggtggacgacagcttctccacagactggaagagtcttctggtggaagaggataagaagcacga  
493 gcggcaccatcttcggcaacatcgtggacgaggtggcctaccacgagaagtacccaccatctacca  
494 cctgagaaagaaactggtggacagcaccgacaaggccgacctgcggtgatctatctggccctggcca  
495 catgatcaagttccggggccacttctgatcgagggcgacctgaaccccgacaacagcgacgtggacia  
496 gctgttcatccagctggtgcagacctacaaccagctgttcgaggaaaacccatcaacgccagcggcgtg  
497 gacccaaggccatcctgtctgccagactgagcaagagcagacggctggaaaatctgatcgccagctg  
498 cccggcgagaagaagaatggcctgttcggaaacctgattgccctgagcctgggctgaccccaactca  
499 agagcaacttcgacctggccgaggatgcaaactgcagctgagcaaggacacctacgacgacgacctg  
500 gacaacctgctggccagatcggcgaccagtacgccgacctgttctggccgccaagaacctgtccgacg  
501 ccatcctgctgagcgacatcctgagagtgaacaccgagatcaccaaggccccctgagcgcctctatgat  
502 caagagatacagcagcaccaccaggacctgacctgctgaaagctctctgtcggcagcagctgcctga  
503 gaagtacaaagagatttcttcgaccagagcaagaacggctacgccggtacattgacggcggagccag  
504 ccaggaagagttctacaagttcatcaagccatcctggaaaagatggacggcaccgaggaactgctcgtg  
505 aagctgaacagagaggacctgctgcggaagcagcggaccttcgacaacggcagcatccccaccaga  
506 tccacctgggagagctgcacgccattctgcggcggcaggaagattttaccattctgaaggacaaccgg  
507 gaaaagatcgagaagatcctgacctccgcatcccactactcgtgggccctctggccaggggaaa cagc  
508 agattcgctggatgaccagaaagagcagggaaacctcaccctggaacttcgaggaagtgggtgga  
509 caagggcgctccgccagagcttcatcgagcggatgaccaacttcgataagaacctgccaacgagaa  
510 ggtgctgccaagcacagcctgctgtacgagtacttcaccgtgtataacgagctgaccaaagtgaatacg  
511 tgaccgagggaatgagaaagcccgccttctgagcggcgagcagaaaaaggccatcgtggacctgctgt  
512 tcaagaccaaccggaagtgacctgaagcagctgaaagaggactactcaagaaaatcgag **TGTC**  
513 **TGGCTGGCGATACTCTCATTACCCTGGCCGATGGACGACGAGTGCCTATT**  
514 **AGAGAACTGGTGTACAGCAGAATTTTTCCGTGTGGGCTCTGAATCCTCA**  
515 **GACTTACCGCCTGGAGAGGGCTAGAGTGAGTAGAGCTTTCTGTACCGGC**  
516 **ATCAAACCTGTGTACCGCCTCACCCTAGACTGGGGAGATCCATTAGGGC**  
517 **CACTGCCAACCACCGATTTCTCACACCTCAGGGCTGGAAACGAGTCGAT**  
518 **GAACTCCAGCCTGGAGATTACCTGGCTCTGCCTAGGAGAATCCCTACTGC**

519 CTCCTGAgaattcCGCTCGAGATAATCAACCTCTGGATTACAAAATTTGTGAA  
520 AGATTGACTGGTATTCTTAACCTATGTTGCTCCTTTTACGCTATGTGGATACG  
521 CTGCTTTAATGCCTTTGTATCATGCTATTGCTTCCCGTATGGCTTTCATTTT  
522 CTCCTCCTTGTATAAATCCTGGTTAGTTCTTGCCACGGCGGAACTCATCG  
523 CCGCCTGCCTTGCCCGCTGCTGGACAGGGGCTCGGCTGTTGGGCACTG  
524 ACAATTCCGTGGTGTATTATTGTGAAATTTGTGATGCTATTGCTTTATTTGT  
525 AACCATCTAGCTTTATTTGTGAAATTTGTGATGCTATTGCTTTATTTGTAACC  
526 ATTATAAGCTGCAATAACAAGTTAACAACAACAATTGCATTCATTTTATGTT  
527 TCAGGTTTCAGGGGGAGATGTGGGAGGTTTTTTAAA

528 Spc5-12-Rma-C-Cas9n(D10A)-C-BPNLS-Linker-W3SL

529 caccgcggtggcggccgtccgccctcggcaccatcctcacgacacccaaatatggcgacgggtgagga  
530 atggtggggagttatTTTTAGAGCGGTGAGGAAGGTGGCAGGCAGCAGGTGTTGGCGCTCTAAAAATAACT  
531 CCCGGGAGTTATTTTTAGAGCGGAGGAATGGTGGACACCCAAATATGGCGACCGGTTCTCAACCGGTGCG  
532 CATATTTGGGTGTCGCCCTCGGCCGGGGCCGCATTCCTGGGGGCCGGGCGGTGCTCCCGCCCGCTCGAT  
533 AAAAGGCTCCGGGGCCGGCGGGCCACGAGCAAGCTTGCCACCATGATGGCGGCGGCGTGCCCGG  
534 AACTGCGTCAGCTGGCGCAGAGCGATGTGTTGGGATCCGATTGTGAGCATTGAACCGGATGGCGTGGAA  
535 GAAGTGTGATCTGACCGTGCCGGGCCGCATAACTTTGTGGCGAACGATATTATTGCGCATAACTGCTCGA  
536 CTCCGTGGAAATCTCCGGCGTGAAGATCGGTTCAACGCCTCCCTGGGCACATACCAGATCTGTGAAAA  
537 TTATCAAGGACAAGGACTCTGGACAATGAGGAAAACGAGGACATTCTGGAAGATATCGTGTGACCCTG  
538 ACACTGTTGAGGACAGAGAGATGATCGAGGAACGGCTGAAAACCTATGCCACCTGTTCGACGACAAA  
539 GTGATGAAGCAGCTGAAGCGGCGGAGATACACCGGCTGGGGCAGGCTGAGCCGGAAGCTGATCAACG  
540 GCATCCGGGACAAGCAGTCCGGCAAGACAATCTGGATTTCTGAAGTCCGACGGCTTCGCAACAGAA  
541 ACTTCATGCAGCTGATCCACGACGACAGCCTGACCTTAAAGAGGACATCCAGAAAGCCAGGTGTCGG  
542 CCAGGGCGATAGCCTGCACGAGCATTGCCAATCTGGCCGGCAGCCCCGCCATTAAGAAGGGCATCCT  
543 GCAGACAGTGAAGGTGGTGGACGAGCTCGTGAAGTGTGGCCGGCACAAGCCCAGAACATCGTGA  
544 TCGAAATGGCCAGAGAGAACCAGACCACCCAGAAGGGACAGAAGAACAGCCGCGAGAGAATGAAG  
545 CGGATCGAAGAGGGCATCAAAGAGCTGGGCAGCCAGATCCTGAAAGAACCCCCGTGGAAAACACCC  
546 AGCTGCAGAACGAGAAGCTGTACCTGTACTACCTGCAGAAATGGGCGGGATGTACTGTGGACCAGGAAC  
547 GGACATCAACCGGCTGTCCGACTACGATGTGGACCATATCGTGCTCAGAGCTTCTGAAGGACGACTCCAT



548 cgacaacaaggtgctgaccagaagcgacaagaaccggggcaagagcgacaacgtgccctccgaaga  
549 ggtcgtgaagaagatgaagaactactggcggcagctgctgaacgccaagctgattaccagagaaagtt  
550 cgacaatctgaccaaggccgagagaggcggcctgagcgaactggataaggccggcttcatcaagagac  
551 agctggtggaaccggcagatcacaagcacgtggcacagatcctggactcccggatgaacactaagt  
552 acgacgagaatgacaagctgatccgggaagtgaagtgatcacctgaagtccaagctggtgctcgattt  
553 ccggaaggattccagttttacaaagtgcgagatcaacaactaccaccacgccacgacgcctacctg  
554 aacgccgtcgtgggaaccgccctgatcaaaaagtaccctaagctggaaagcgagttcgtgtacggcgact  
555 acaaggtgtacgacgtgcggaagatgatcgccaagagcgagcaggaaatcggcaaggctaccgcaa  
556 gtacttctctacagcaacatcatgaacttttcaagaccgagattaccctggccaacggcgagatccgga  
557 gcggcctctgatcgagacaaacggcgaaccggggagatcgtgtgggataaggccgggattttgccac  
558 cgtgcggaaagtgctgagcatgccccaaagtgaatatcgtgaaaagaccgaggtgcagacaggcggctt  
559 cagcaaagagtctatcctgcccaagaggaacagcgataagctgatcgccagaaagaaggactgggac  
560 cctaagaagtacggcggcttcCTTTGcccaccgtggcctattctgtgctggtggtggccaaagtggaa  
561 aagggaagtccaagaaactgaagagtgtgaaagagctgctggggatcaccatcatggaagaagca  
562 gcttcgagaagaatcccatcgactttctggaagccaagggtacaaagaagtgaaaaggacctgatcat  
563 caagctgcctaagtactccctgttcgagctggaaaacggccggaagagaatgctggcctctgccAAGC  
564 AActgcagaagggaaacgaactggccctgccctccaaatatgtgaacttctgtacctggccagccactat  
565 gagaagctgaagggtccccgaggataatgagcagaaacagctgtttgtggaacagcacaagcacta  
566 cctggacgagatcatcgagcagatcagcgagttctcaagagagtgatcctggccgacgctaacttgac  
567 aaagtgtgtccgcctacaacaagcaccgggataagccatcagagagcaggccgagaatatcatcca  
568 cctgtttaccctgaccaatctgggagcccctgccgcctcaagtactttgacaccaccatcgaccggaagC  
569 AAtacAGAagcaccaagaggtgctggacgccaccctgatccaccagagcatcaccggcctgtacga  
570 gacacggatcgacctgtctcagctgggaggtgactctggcggctcaaaaagaaccgcccagcggcagcg  
571 aattcgagcccaagaagaagaggaaagtcataagaattcCGCTCGAGATAATCAACCTCTG  
572 GATTACAAAATTTGTGAAAGATTGACTGGTATTCTTA ACTATGTTGCTCCTT  
573 TTACGCTATGTGGATACGCTGCTTTAATGCCTTTGTATCATGCTATTGCTTC  
574 CCGTATGGCTTTCATTTCTCCTCCTTGTATAAATCCTGGTTAGTTCTTGCC  
575 ACGGCGGAACTCATCGCCGCCTGCCTTGCCCGCTGCTGGACAGGGGCT  
576 CGGCTGTTGGGCACTGACAATTCCGTGGTGTGTTTATTTGTGAAATTTGTGAT  
577 GCTATTGCTTTATTTGTAACCATCTAGCTTTATTTGTGAAATTTGTGATGCTA

578 TTGCTTTATTTGTAACCATTATAAGCTGCAATAAACAAGTTAACAACAACAA  
579 TTGCATTCATTTTATGTTTCAGGTTTCAGGGGGAGATGTGGGAGGTTTTTTA  
580 AA

581 hU6-**Spacer**-SpCas9 sgRNA scaffiod-Spc5-12-Rma-C-Cas9n(D10A)-C-BPN  
582 LS-Linker-W3SL

583 gagggcctatttcccatgattcctcatatttgcatacagatacaaggctgtagagagataattggaattaatt  
584 tgactgtaaacacaaagatattagtagtaaaaatacgtgacgtagaaagtaataatttctgggtagttgcagttt  
585 taaaattatgttttaaaatggactatcatatgcttaccgtaactgaaagtatttgcatttctggctttatatacttG  
586 TGGAAAGGACGAAACACC**GATACTTACAGGCTCCAATAG**gtttagagctaGAA  
587 AtagcaagttaaaataaggctagtccttatcaactgaaaaagtggcaccgagtcggtgcTTTTTca  
588 ccgcggtggcggccgtccgccctcggcaccatcctcacgacacccaaataggcgacgggtgaggaatg  
589 gtggggagttatttttagagcggtaggaagggtgggcaggcagcaggtgtggcgctctaaaaataactcc  
590 cgggagttatttttagagcgggaggaatggtggacacccaaataggcgaccggttctcaaccggtcgcca  
591 tatttgggtgtccgccctcggccggggccgcattcctgggggcccggcggtgctcccgccgcctcgataa  
592 aaggctccggggccggcggcggcccacgagcaagcttgcacatgatggcgggcggcgtgcccgaa  
593 ctgcgtcagctggcgcagagcagatgtgtattgggatccgattgtgagcattgaaccggatggcgtggaaga  
594 agtgtttgatctgaccgtgccgggcccgcataactttgtggcgaacgatatttgcgcataactgcttcgactc  
595 cgtggaatctccggcgtggaagatcgggtcaacgcctccctgggcacataccacgatctgctgaaaattat  
596 caaggacaaggacttctggacaatgaggaaaacgaggacattctggaagatatcgtgctgaccctgac  
597 actgtttgaggacagagagatgatcgaggaacggctgaaaacctatgccacctgttcgacgacaaaagtg  
598 atgaagcagctgaagcggcggagatacaccgctggggcaggctgagccggaagctgatcaaccgca  
599 tccgggacaagcagtcggcaagacaatcctggatttctgaagtccgacggcttcgccaacagaaactt  
600 catgcagctgatccacgacgacagcctgaccttaagaggacatccagaaagccagggttccggcca  
601 gggcgatagcctgcacgagcacattgccaatctggccggcagccccgccattaagaagggtcctgca  
602 gacagtgaagggtggacgagctcgtgaaagtgatgggcccgcacaagcccgagaacatcgtgatcg  
603 aatggccagagagaaccagaccaccagaaggacagaagaacagccgagagagaatgaagcg  
604 gatcgaagagggcatcaaagagctgggcagccagatcctgaaagaacaccccgtggaacacccag  
605 ctgcagaacgagaagctgtacctgtactacctgcagaatgggcgggatgttacgtggaccaggaactgg  
606 acatcaaccgctgtccgactacgatgtggaccatatcgtgcctcagagctttctgaaggacgactccatcg

607 acaacaaggtgctgaccagaagcgacaagaaccggggcaagagcgacaacgtgccctccgaagagg  
608 tcgtgaagaagatgaagaactactggcggcagctgctgaacgccaagctgattaccagagaaagtctg  
609 acaatctgaccaaggccgagagaggcggcctgagcgaactggataaggccggctcatcaagagaca  
610 gctggtggaacccggcagatcacaagcacgtggcacagatcctggactcccggatgaacactaagta  
611 cgacgagaatgacaagctgatccgggaagtgaagtgatcacctgaagtccaagctggtgctcgattc  
612 cggaaggattccagttttacaaagtgcgagatcaacaactaccaccacgcccacgacgcctacctga  
613 acgccgtcgtgggaaccgccctgatcaaaaagtaccctaagctggaaagcgagttcgtgtacggcgacta  
614 caaggtgtacgacgtgcggaagatgatcgccaagagcgagcaggaaatcggcaaggctaccgccaag  
615 tacttctctacagcaacatcatgaacttttcaagaccgagattaccctggccaacggcgagatccggaag  
616 cggcctctgatcgagacaaacggcgaaaccggggagatcgtgtgggataagggccgggattttgccacc  
617 gtgcggaaagtgtgagcatgccccaaagtgaatatcgtgaaaagaccgaggtgcagacaggcggcttc  
618 agcaaagagtctatcctgcccaagaggaacagcgataagctgatcgccagaaagaaggactgggacc  
619 ctaagaagtacggcggcttcCTTTGGcccaccgtggcctattctgtgctggtggtggccaaagtggaaa  
620 agggcaagtccaagaaactgaagagtgtgaaagagctgctggggatcaccatcatggaagaagcag  
621 ctgcgagaagaatcccatcgactttctggaagccaagggctacaaagaagtgaaaaggacctgatcatc  
622 aagctgcctaagtactccctgttcgagctggaaaacggccggaagagaatgctggcctctgccAAGCA  
623 Actgcagaagggaaacgaactggccctgccctccaaatatgtgaacttctgtacctggccagccactatg  
624 agaagctgaagggtccccgaggataatgagcagaaacagctgtttgtggaacagcacaagcactac  
625 ctggacgagatcatcgagcagatcagcgagtttccaagagagtgatcctggccgacgctaacttgaca  
626 aagtgtgtccgctacaacaagcaccgggataagcccatcagagagcaggccgagaatatcatccac  
627 ctgtttaccctgaccaatctgggagcccctgccgcctcaagtactttgacaccaccatcgaccggaagCA  
628 AtacAGAagcaccaaagaggtgctggacgccaccctgatccaccagagcatcaccggcctgtacgag  
629 acacggatcgacctgtctcagctgggaggtgactctggcggctcaa**aaagaaccgcccagcggcagcga**  
630 **attcgagccaagaagaagaggaaagct**taagaattcCGCTCGAGATAATCAACCTCTGG  
631 ATTACAAAATTTGTGAAAGATTGACTGGTATTCTTA ACTATGTTGCTCCTTT  
632 TACGCTATGTGGATACGCTGCTTTAATGCCTTTGTATCATGCTATTGCTTCC  
633 CGTATGGCTTTTCAATTTCTCCTCCTTGATAAATCCTGGTTAGTTCTTGCCA  
634 CGGCGGAACTCATCGCCGCCTGCCTTGCCCGCTGCTGGACAGGGGCTC  
635 GGCTGTTGGGCACTGACAATTCCGTGGTGTGTTATTTGTGAAATTTGTGAT  
636 GCTATTGCTTTATTTGTAACCATCTAGCTTTATTTGTGAAATTTGTGATGCTA

637 TTGCTTTATTTGTAACCATTATAAGCTGCAATAAACAAGTTAACAACAACAA  
638 TTGCATTCATTTTATGTTTCAGGTTTCAGGGGGAGATGTGGGAGGTTTTTTA  
639 AA
